# Supplementary material
Source: publisher figshare collection journal article supplement (https://gsajournals.figshare.com/ndownloader/files/25458152)
Supplement: Supplementary file 1 [file 25458152]

**Supplementary figure S3a**: Hexaploid map of male parent by chromosome. The copies of each chromosome are represented with A-G.
